# Supplementary material
Source: Copernicus journal article supplement (doi:10.5194/egusphere-2026-626)
Supplement: Supplementary file 1 [file egusphere-2026-626-supplement.pdf]

# Supplementary Information to “Earth system models overestimate the local plant productivity response to temperature–moisture extremes” by M. Adam et al.

---

In this Supplementary Information (SI), we provide additional figures on the nullmodel’s convergence (Sect. S1), significance patterns that overlap between the datasets (Sect. S2), the assignment of IPCC regions to climatic zones (Sect. S3), statistical coupling strength and peak timing (Sect. S4), mechanistic responses (Sect. S5), and mean GPP biases (Sect. S6).

## List of Figures

|     |                                                                                                                    |    |
|-----|--------------------------------------------------------------------------------------------------------------------|----|
| S1  | Nullmodel convergence . . . . .                                                                                    | 2  |
| S2  | Overlap between significance patterns in FLUXCOM and the ESMs . . . . .                                            | 3  |
| S3  | Share of grid cells with significant statistical coupling above the null model range                               | 4  |
| S4  | ...and below the null model range . . . . .                                                                        | 5  |
| S5  | Assignment of IPCC regions to broad climatic zones . . . . .                                                       | 6  |
| S6  | Highest share of co-occurrences and corresponding timings for hot–wet–high . .                                     | 7  |
| S7  | ...for cold–dry–low . . . . .                                                                                      | 8  |
| S8  | ...for cold–wet–low . . . . .                                                                                      | 9  |
| S9  | ...for hot–dry–high . . . . .                                                                                      | 10 |
| S10 | ...for hot–wet–low . . . . .                                                                                       | 11 |
| S11 | ...for cold–dry–high . . . . .                                                                                     | 12 |
| S12 | ...and for hot–dry–low . . . . .                                                                                   | 13 |
| S13 | Agreement in regionally averaged co-occurrence rate and timing for precipitation as a moisture indicator . . . . . | 14 |
| S14 | Categorization of enhanced and muted co-occurrence rates for CESM2 . . . . .                                       | 15 |
| S15 | ...and for MPI-ESM . . . . .                                                                                       | 16 |
| S16 | Mean GPP bias in the ESMs . . . . .                                                                                | 17 |

## S1 Convergence of the null model

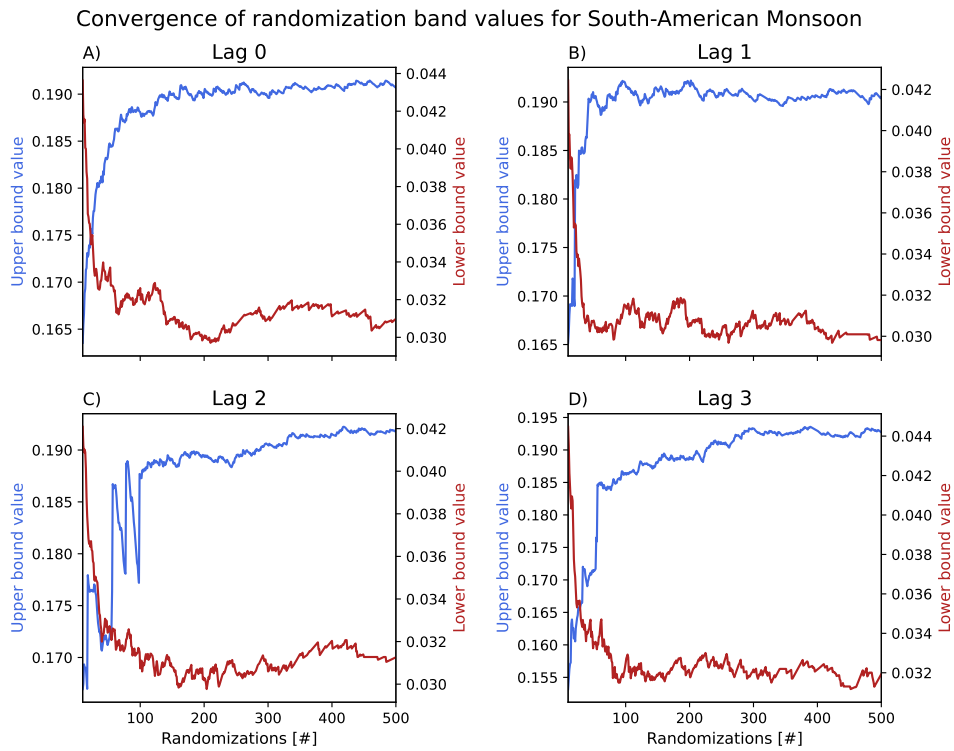

**Figure S1 | Nullmodel convergence at different lags between temperature–moisture and GPP extremes.** This example covers the South-American Monsoon (see Iturbide et al. (2020)) and reports the 95% range of the nullmodel ensemble as upper and lower bounds in units  $^{[COR]}/_{100}$ .

## S2 Significance patterns and share of significant cells

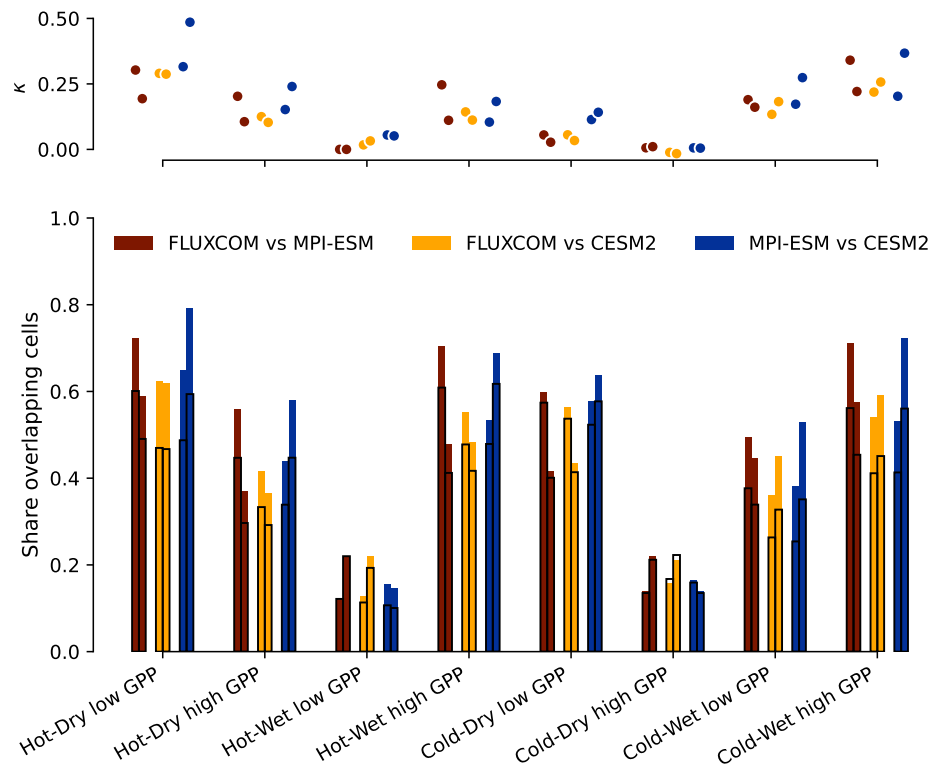

**Figure S2 | Overlap between significance patterns in FLUXCOM and the ESMs.** Black outlines (bottom panel) represent the average overlap when randomizing the patterns, indicating that patterns overlap by chance. The likelihood of accidentally overlapping patterns is reflected in the  $\kappa$  statistics (upper panel):  $\kappa \approx 0$  represents randomness,  $\kappa \rightarrow 1$  indicates high confidence in the signal.

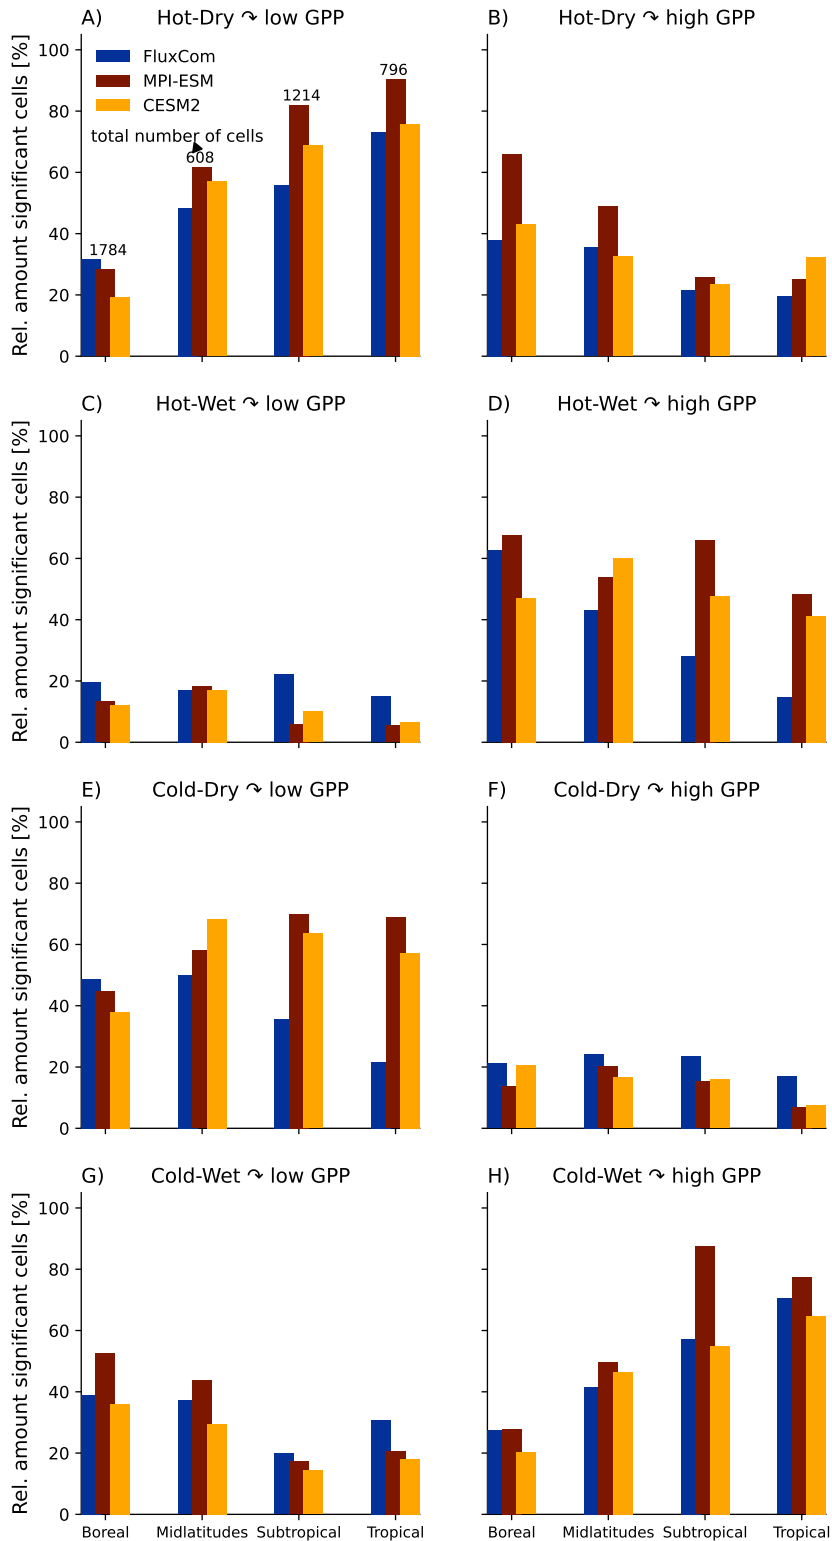

**Figure S3 | Share of grid cells with significant statistical coupling between climatic compound and GPP extremes.** Here, all grid cells which exceed the null model's 95<sup>th</sup> quantile at lag one or more are considered significant. Combinations of GPP extremes in the succession of temperature–soil moisture extremes are indicated above individual panels.

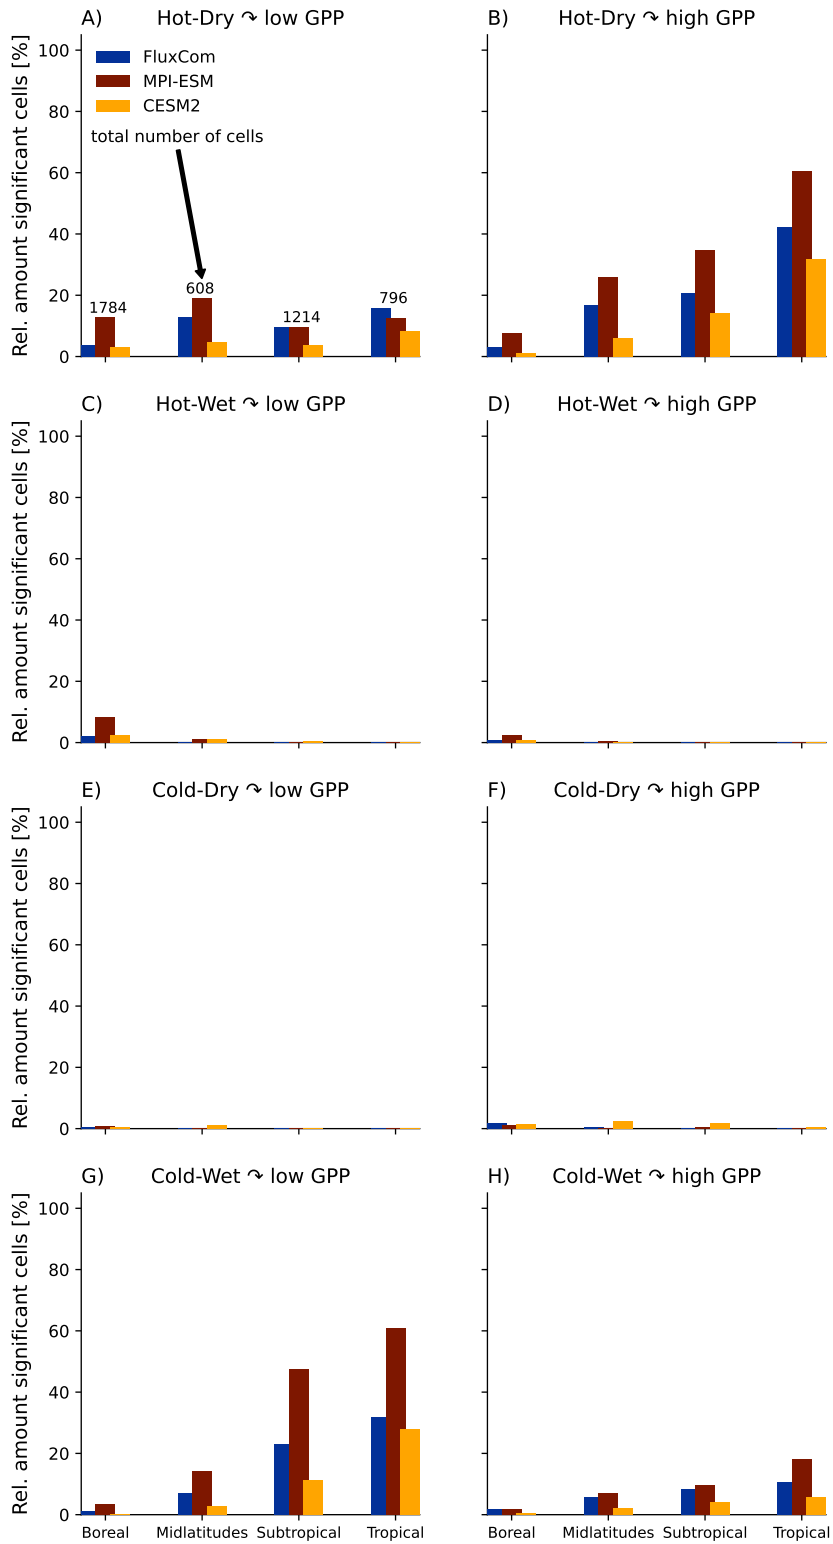

**Figure S4** | Analogous to Figure S3 but considering all grid cells which undercut the null model's 5<sup>th</sup> quantile at lag one or more as significant.

### S3 Assignment of IPCC regions to broad climatic zones

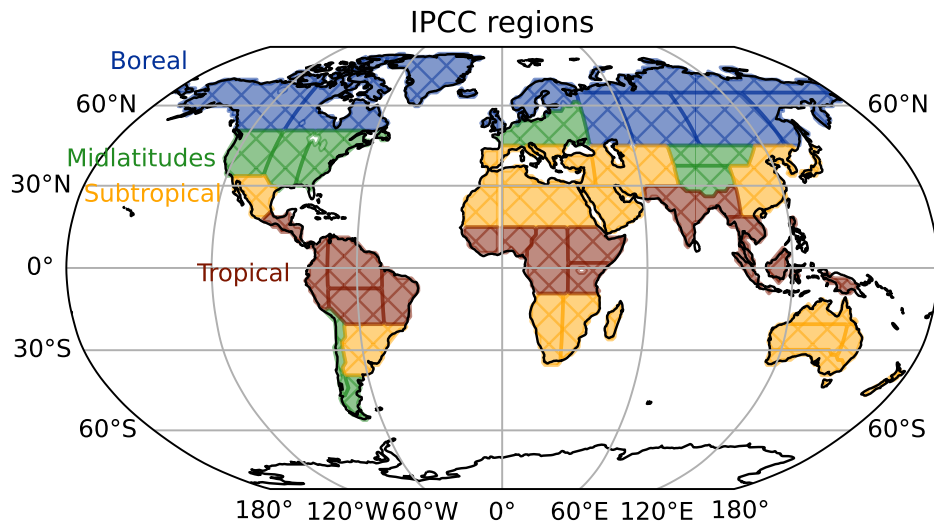

Figure S5 | Assignment of IPCC regions (Iturbide et al., 2020) to broad climatic zones.

## S4 Maps of statistical coupling strength and peak timing

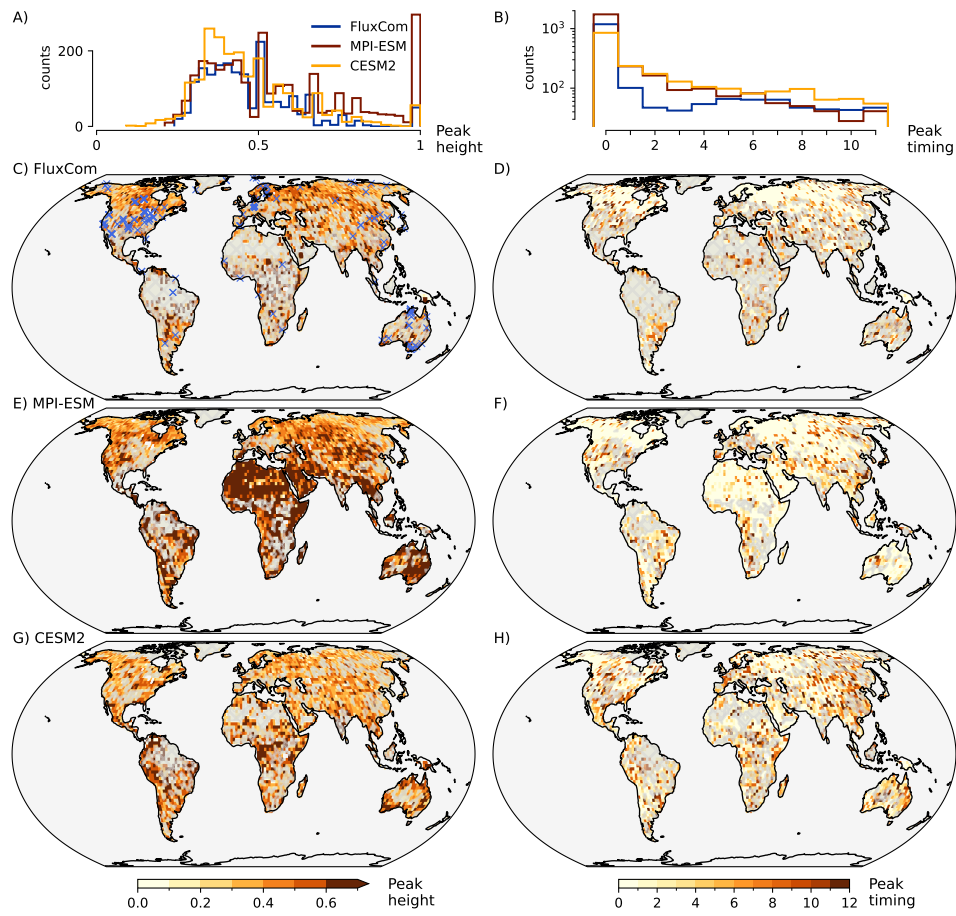

Figure S6 | Highest share of co-occurrences and corresponding timings for hot-wet-high analogues to Fig. 2 of the manuscript.

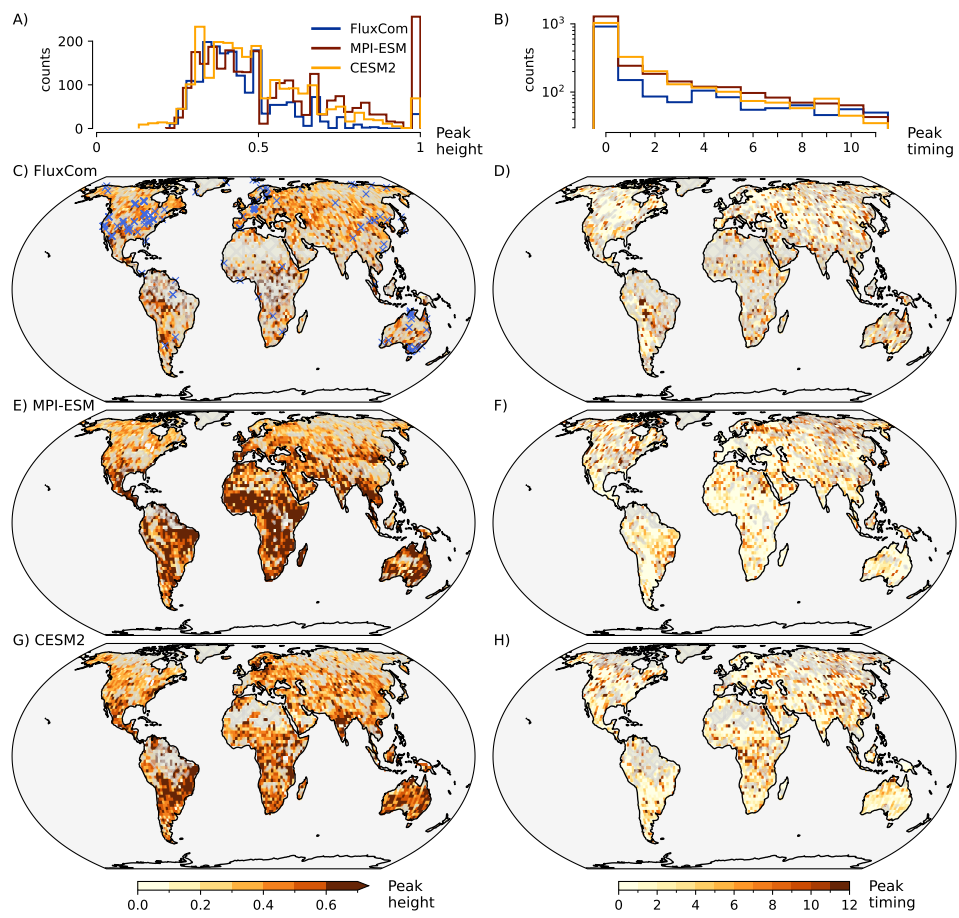

Figure S7 | Analogous to Fig. S6 but for cold-dry-low.

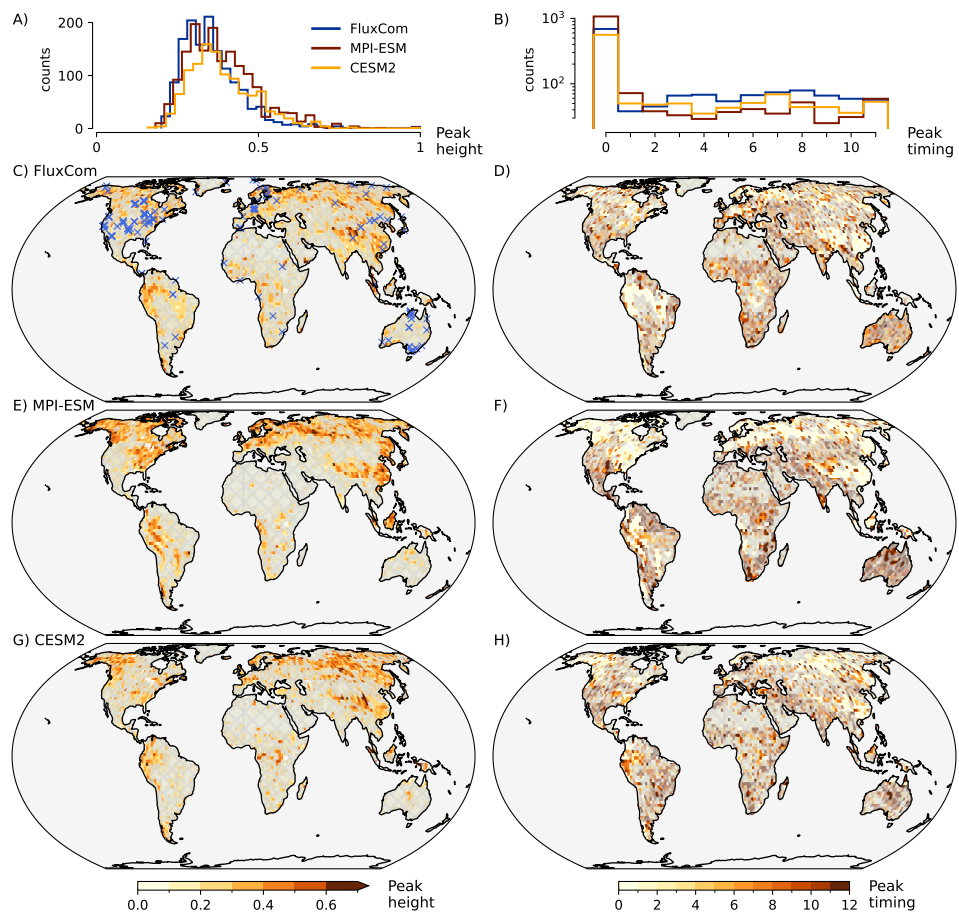

Figure S8 | Analogous to Fig. S6 but for cold-wet-low

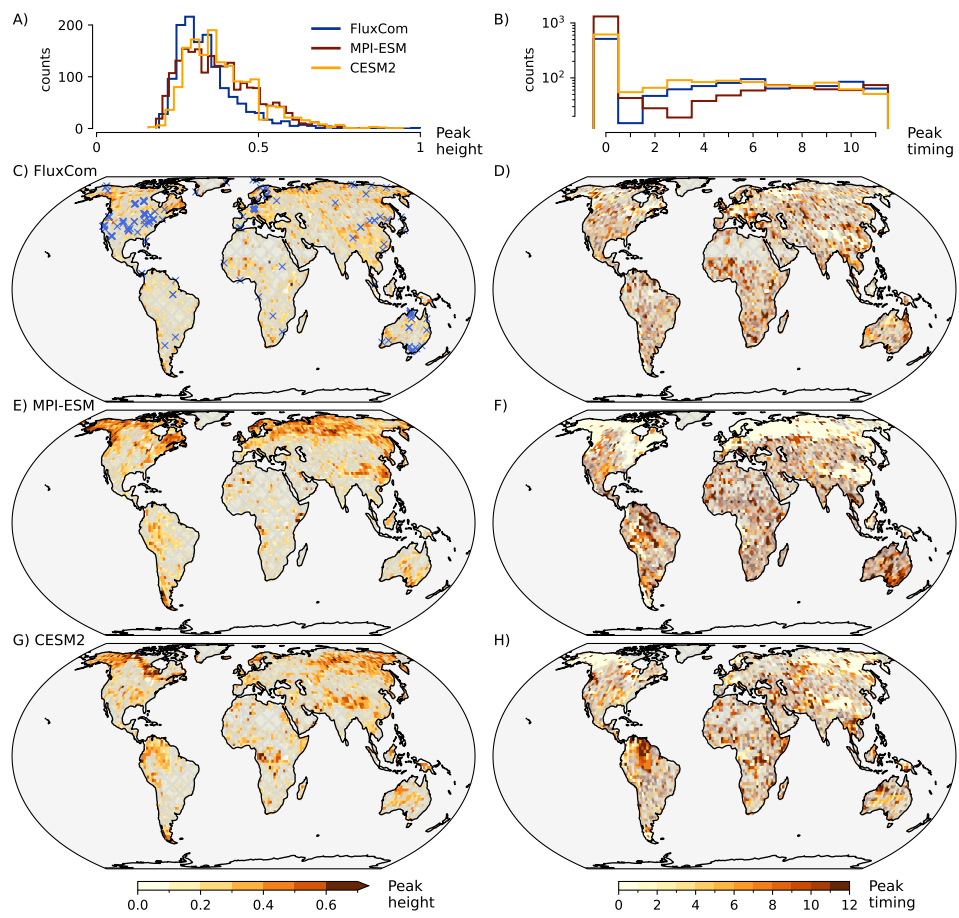

Figure S9 | Analogue to Fig. S6 but for hot-dry-high

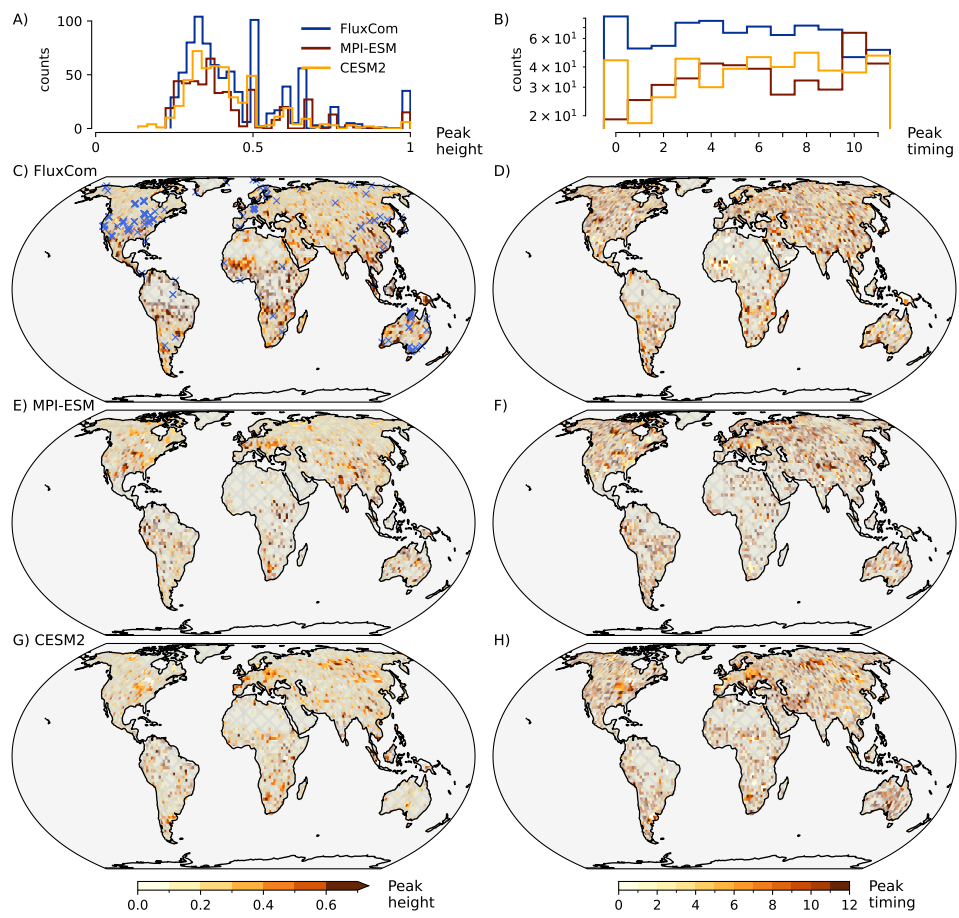

Figure S10 | Analogous to Fig. S6 but for hot-wet-low

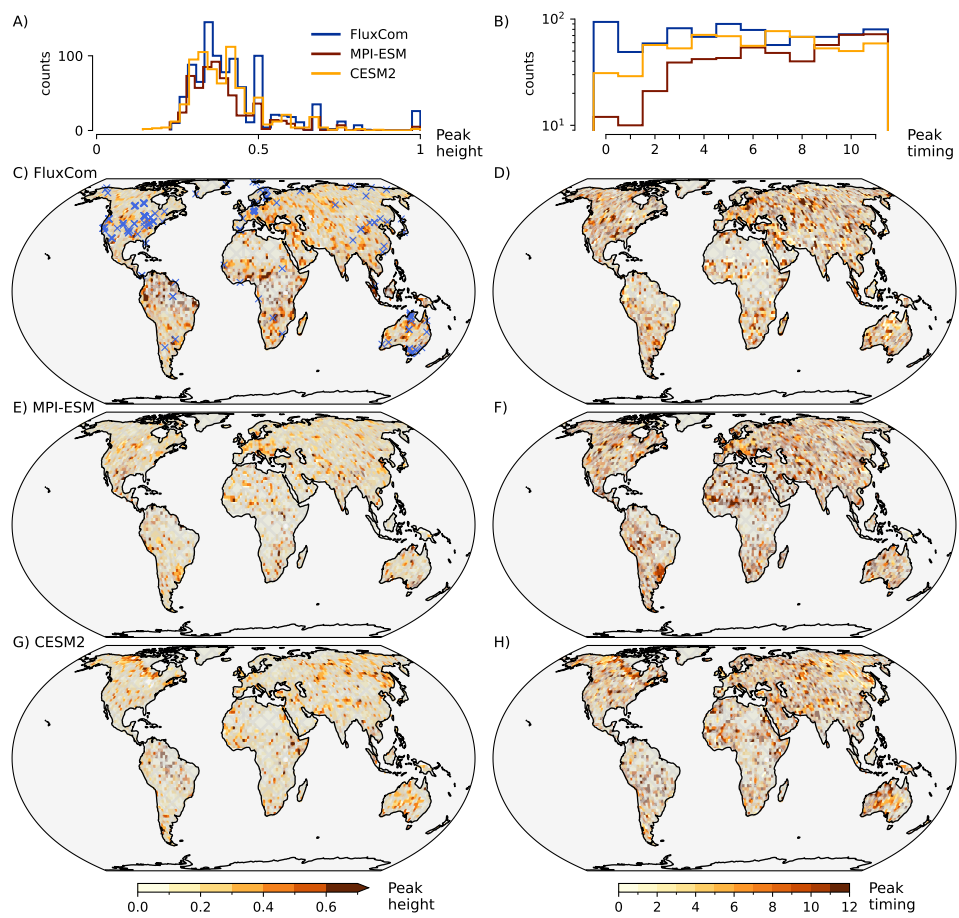

Figure S11 | Analogous to Fig. S6 but for cold-dry-high

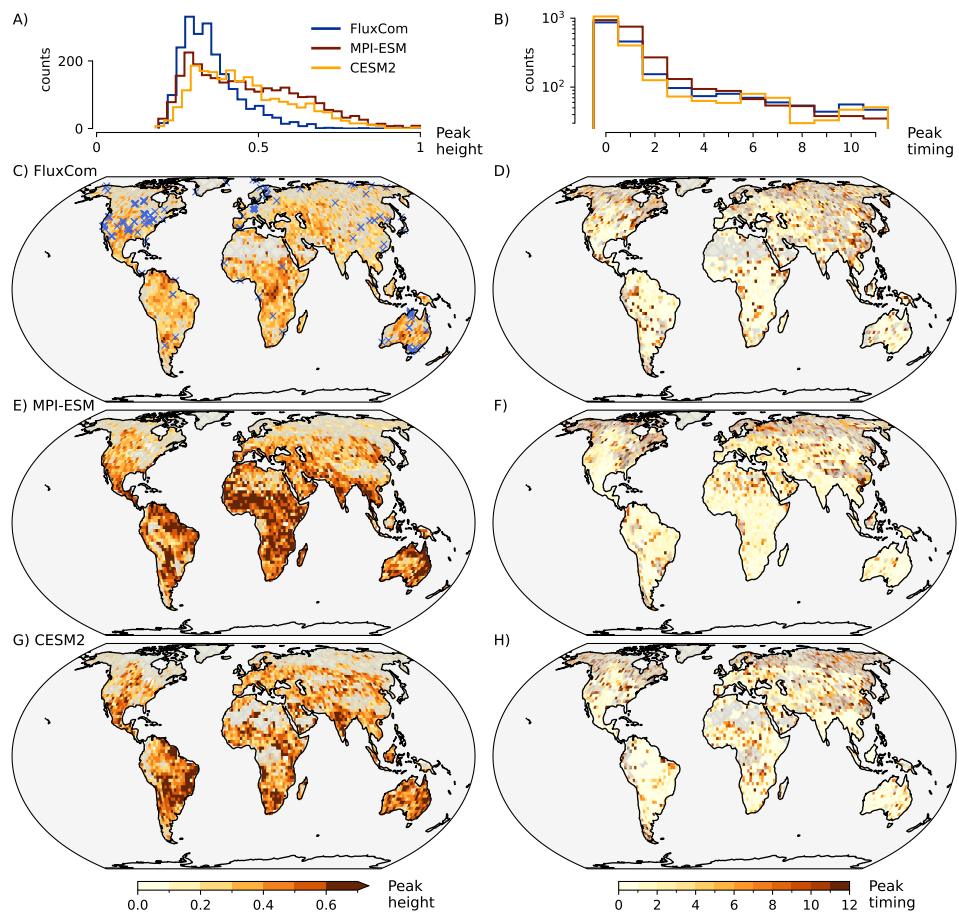

Figure S12 | Analogous to Fig. S6 but for hot-dry-low

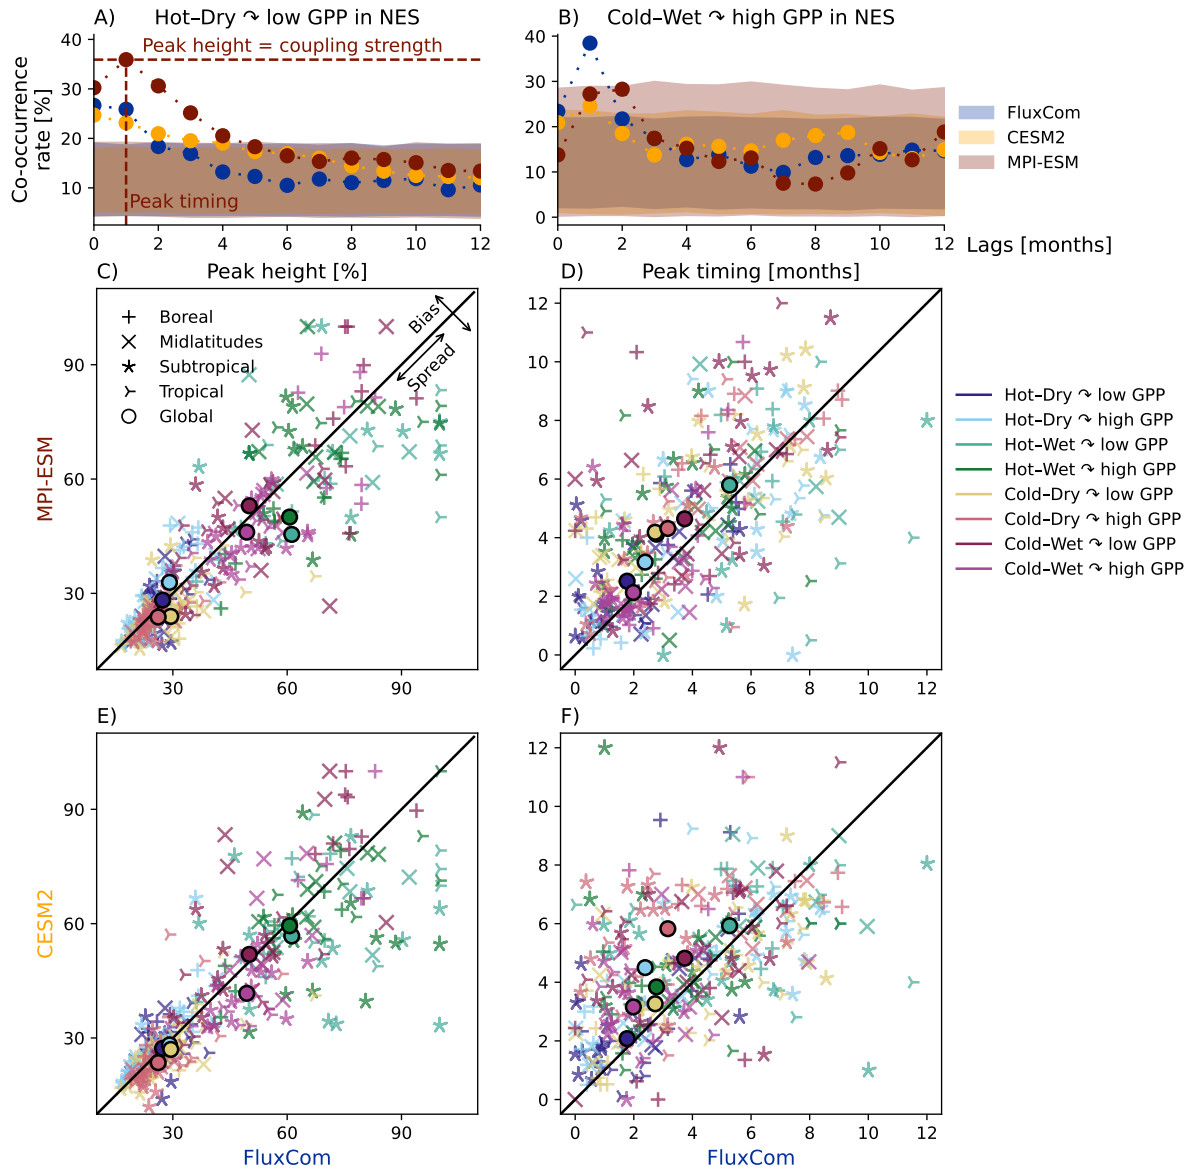

**Figure S13 | Agreement in regionally averaged co-occurrence rate and timing between FLUXCOM and the model datasets for precipitation as a moisture indicator. Description analogous to Fig. 4 of the manuscript.**

## S5 Mechanistic response in the Earth system models

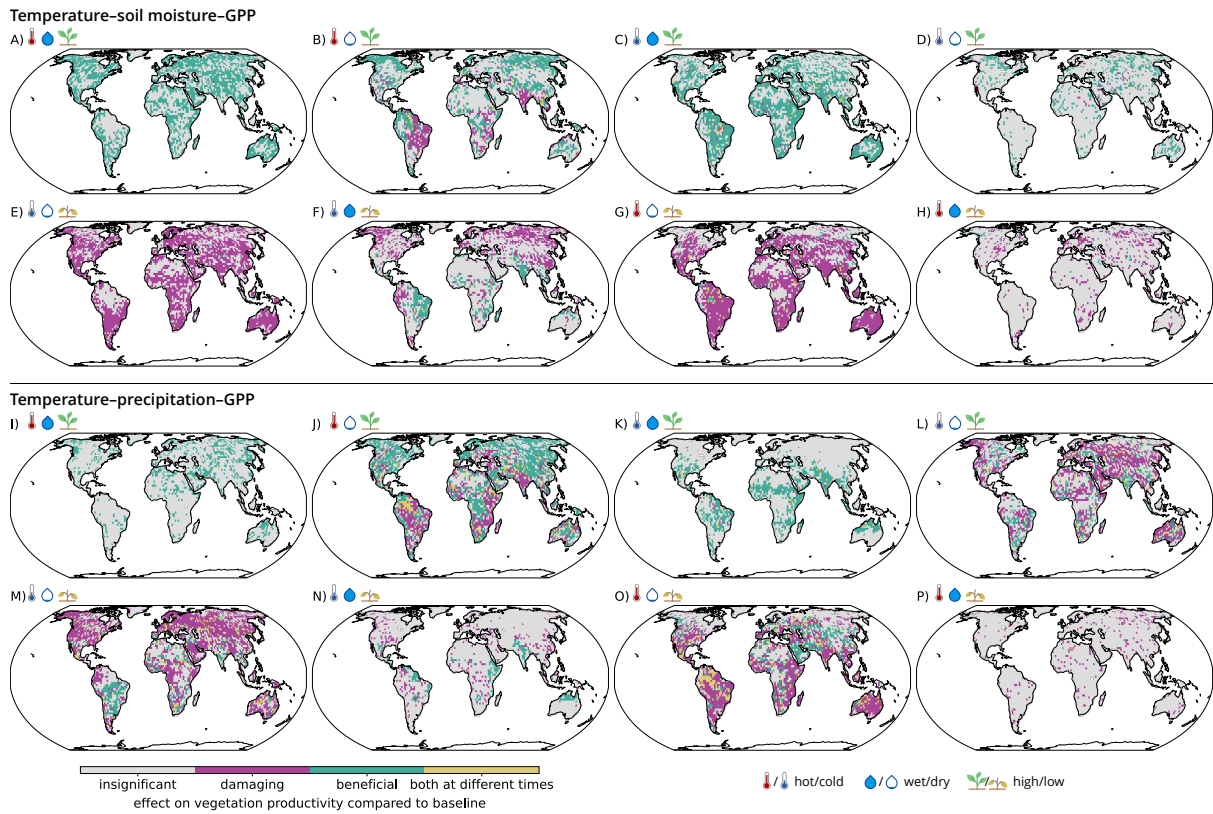

**Figure S14 | Categorization of enhanced and muted co-occurrence rates between temperature-soil moisture and GPP extremes and between temperature-precipitation and GPP extremes for CESM2. Description analogous to Fig. 5 of the manuscript.**

Temperature-soil moisture-GPP

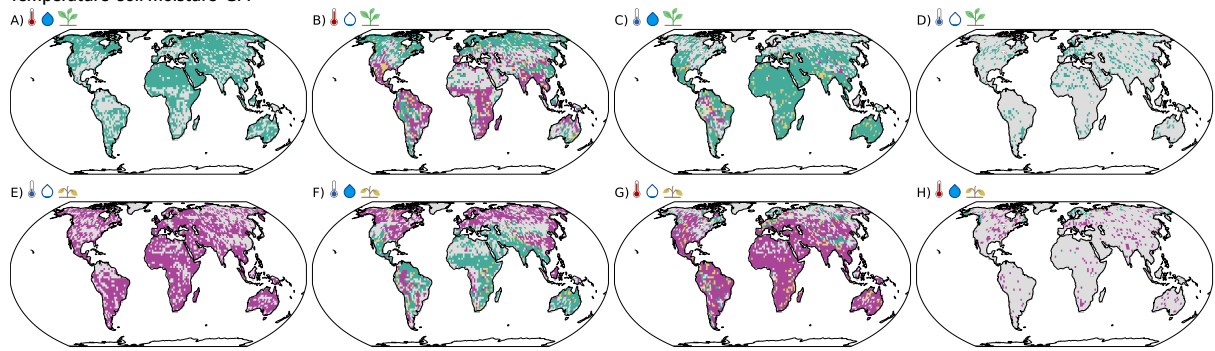

Temperature-precipitation-GPP

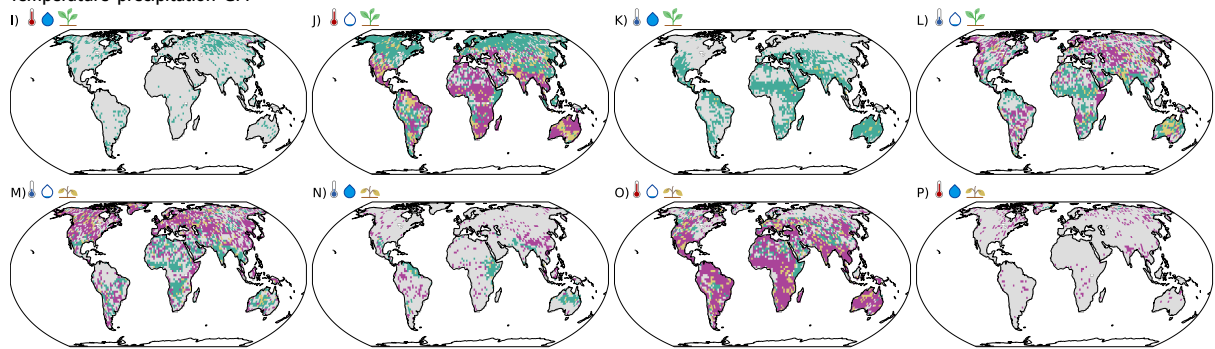

insignificant    damaging    beneficial    both at different times  
effect on vegetation productivity compared to baseline

hot/cold    wet/dry    high/low

Figure S15 | Analogous to Fig. S14 but for MPI-ESM.

## S6 Mean GPP bias in the Earth system models

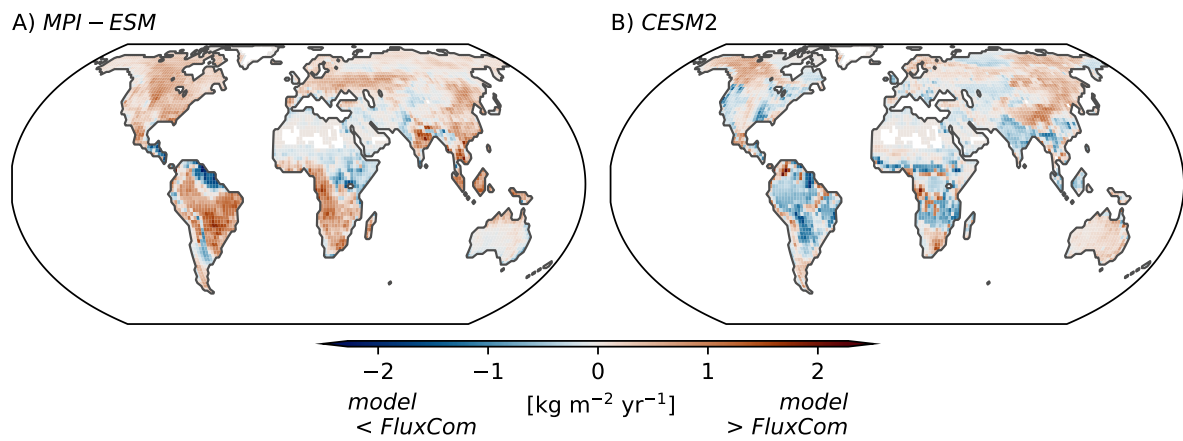

**Figure S16 | Mean GPP bias between FLUXCOM and the ESMs.** Panels depict the 1999 to 2014 average anomalies to FLUXCOM.
